# Supplementary material for: Integration of whole genome sequencing and transcriptomics reveals a complex picture of the reestablishment of insecticide resistance in the major malaria vector Anopheles coluzzii
Source: PubMed Central journal article supplement (PMC8741062; doi:10.1371/journal.pgen.1009970), 2021-12-23

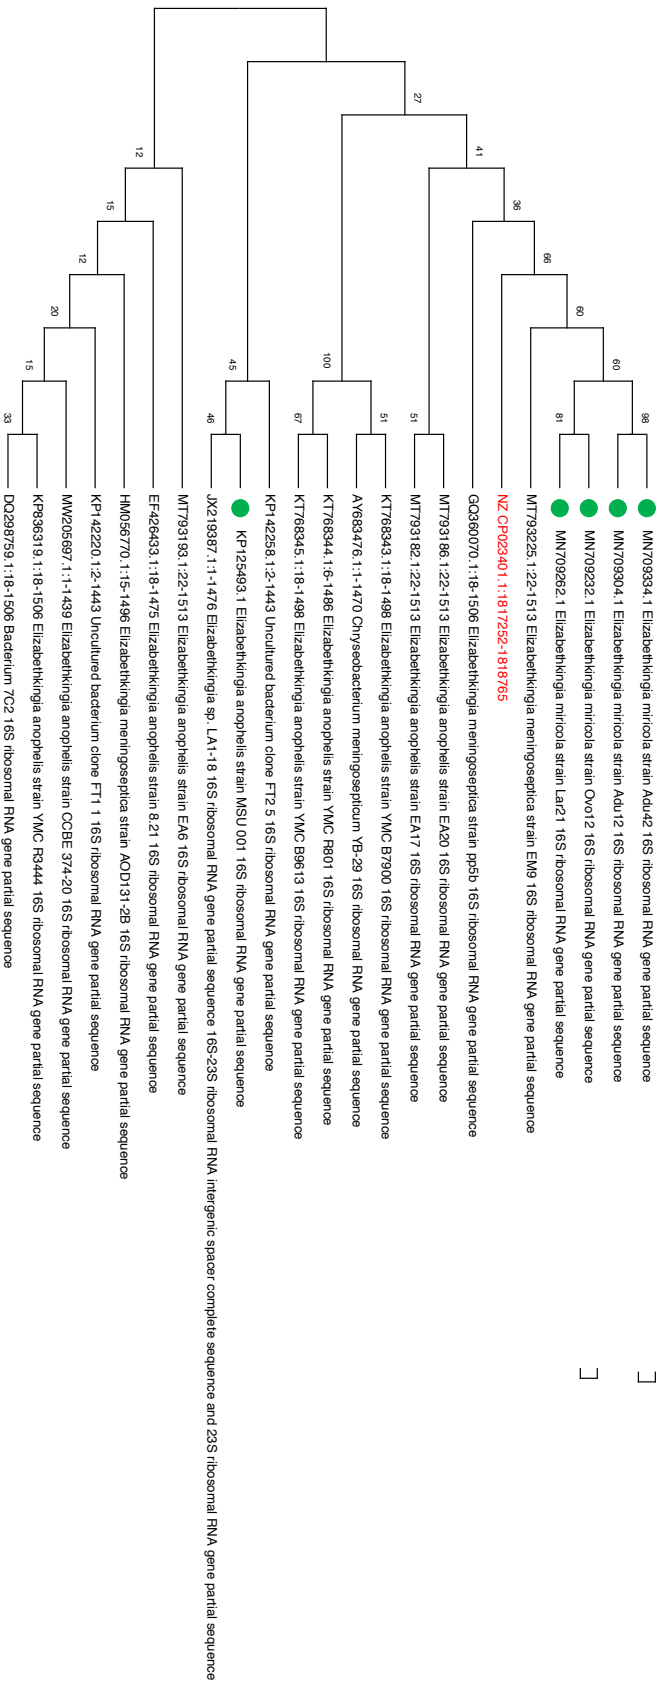

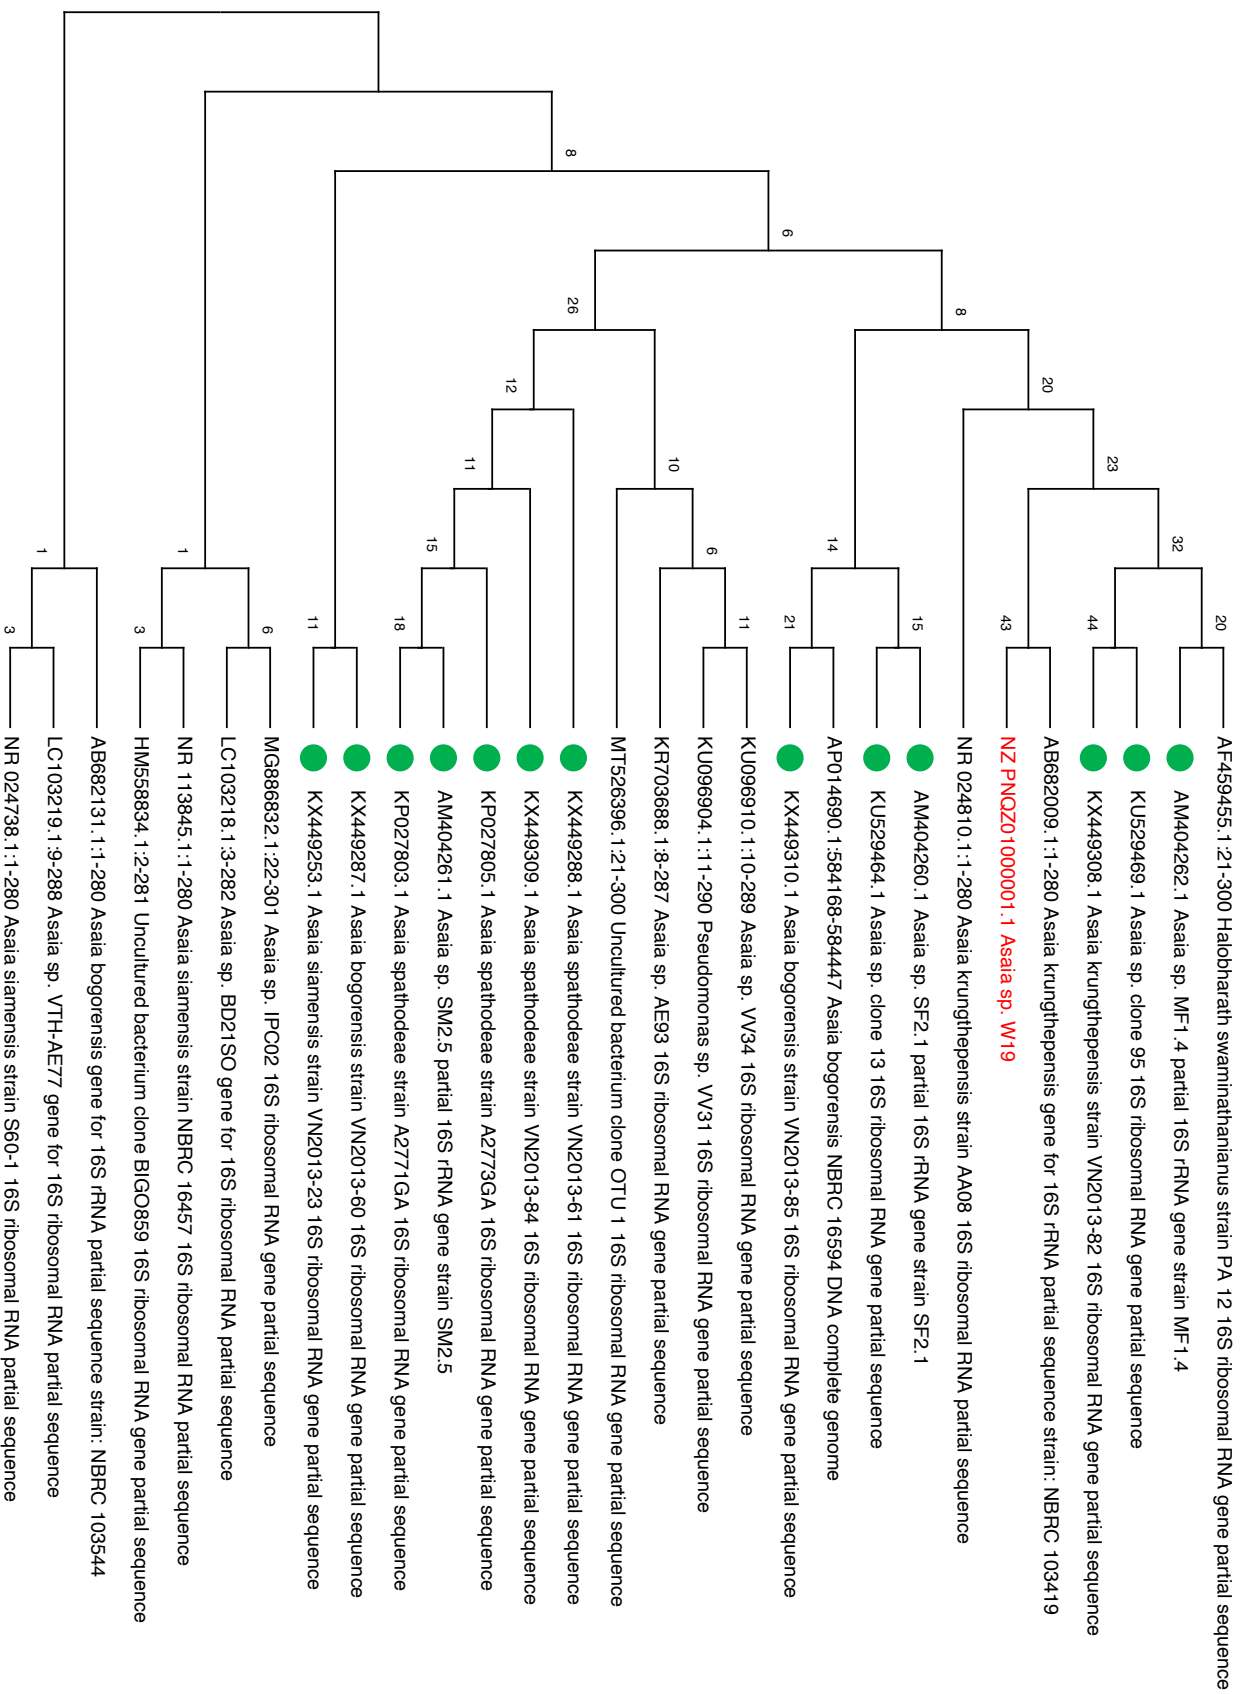

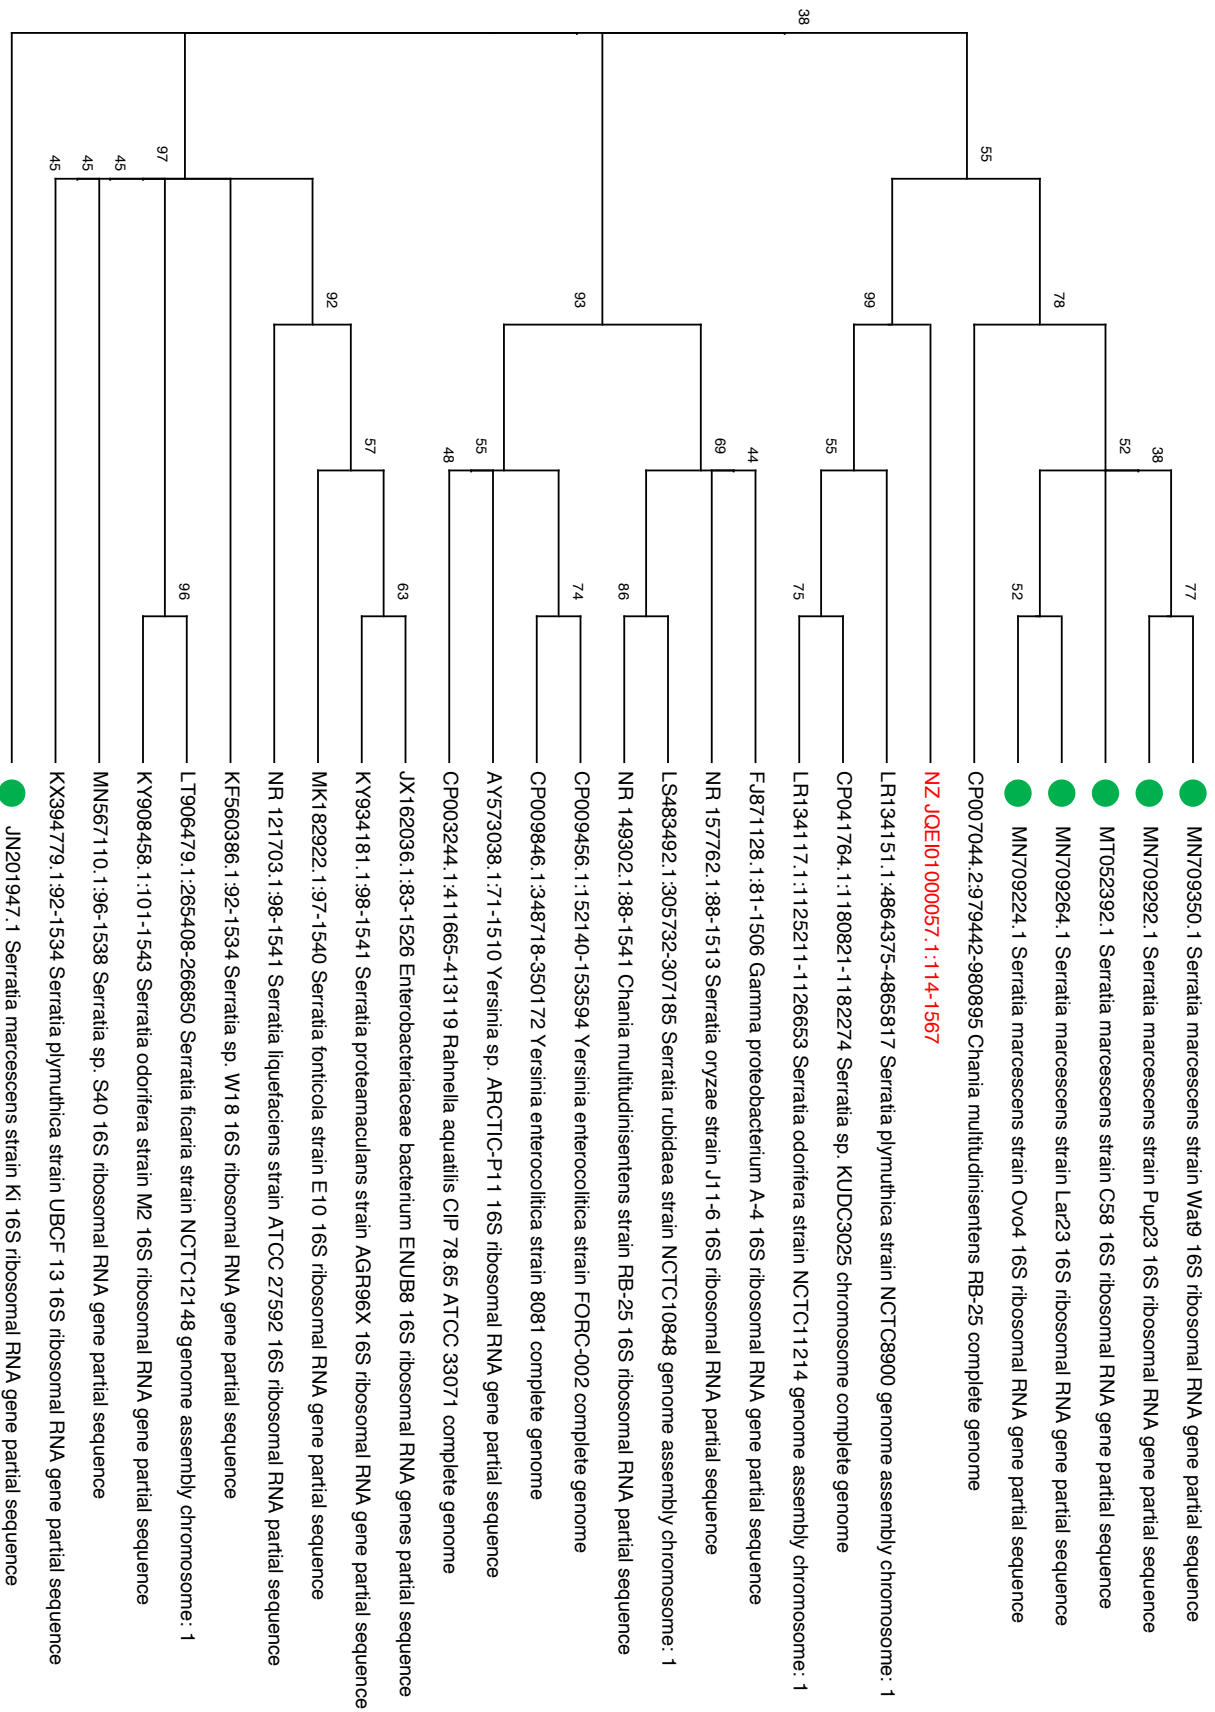

Supplement: pgen.1009970.s006.pdf [file pgen.1009970.s006.pdf]
